# Supplementary figures and images for: Tunable luminescence and energy transfer properties in Ca8MgLu(PO4)7:Ce3+,Tb3+,Mn2+ phosphors
Source: Royal Society of Chemistry journal article supplement (doi:10.1039/c4tc02433h), 2015-01-01

## Electronic Supplementary Information (ESI)

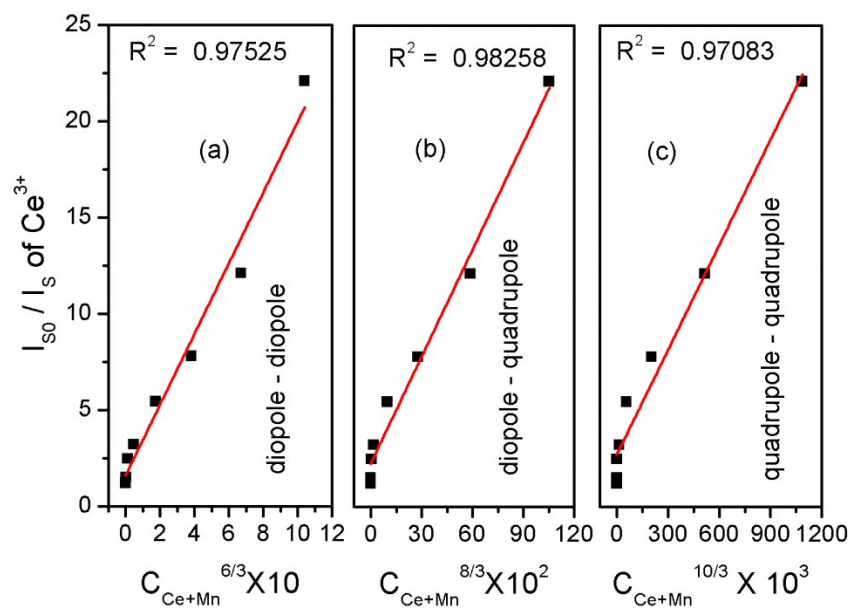

**Figure S1. Dependence of  $I_{S0} / I_S$  of  $Ce^{3+}$  on  $C^{6/3}$ ,  $C^{8/3}$  and  $C^{10/3}$**

Supplement: c4tc02433h1.pdf [file c4tc02433h1.pdf]
